# Supplementary material
Source: publisher figshare collection journal article supplement (https://brill.figshare.com/articles/dataset/_/25585164)
Supplement: Supplementary file 1 [file 1]

## Sheet: Table S1
Table S1 Detailed sampling timepoint information per included subject
Subject ID	Timepoint	Real days after birth	Theoretical days after birth		Subject ID	Timepoint	Real days after birth	Theoretical days after birth
104	F1	1	1		118	F8	357	365
104	F2	2	2		118	F9	838	730
104	F3	NA	7		118	FM	7352	7300
104	F4	NA	14		120	F1	1	1
104	F5	NA	31		120	F2	2	2
104	F6	NA	63		120	F3	8	7
104	F7	NA	186		120	F4	16	14
104	F8	NA	365		120	F5	28	31
104	FM	NA	7300		120	F6	91	63
106	F1	NA	1		120	F7	184	186
106	F3	8	7		120	F8	356	365
106	F4	15	14		120	F9	769	730
106	F5	34	31		120	FM	7304	7300
106	F6	94	63		125	F1	5	1
106	F7	186	186		125	F2	6	2
106	F8	400	365		125	F3	NA	7
106	FM	7305	7300		125	F4	16	14
11	F1	3	1		125	F5	35	31
11	F2	5	2		125	F6	NA	63
11	F4	16	14		125	F7	184	186
11	F5	32	31		125	F8	NA	365
11	F7	NA	186		125	F9	NA	730
11	F8	366	365		125	FM	7312	7300
11	FM	7314	7300		128	F1	NA	1
112	F1	4	1		128	F4	NA	14
112	F3	8	7		128	F5	33	31
112	F4	16	14		128	F6	NA	63
112	F5	32	31		128	F7	NA	186
112	F6	93	63		128	F8	NA	365
112	F7	185	186		129	F1	1	1
112	F8	367	365		129	F2	NA	2
112	FM	7308	7300		129	F3	7	7
116	F2	6	2		129	F4	14	14
116	F3	8	7		129	F5	NA	31
116	F4	14	14		129	F6	NA	63
116	F5	32	31		129	F7	182	186
116	F6	106	63		129	F8	366	365
116	F7	192	186		129	FM	NA	7300
116	F8	387	365		13	F1	2	1
116	F9	NA	730		13	F2	NA	2
118	F1	1	1		13	F3	NA	7
118	F2	2	2		13	F4	17	14
118	F3	NA	7		13	F5	NA	31
118	F4	NA	14		13	F6	86	63
118	F5	NA	31		13	F8	367	365
118	F6	NA	63		132	F2	NA	2
118	F7	185	186		132	F3	10	7
132	F4	21	14		153	F9	982	730
132	F5	NA	31		153	FM	7308	7300
132	FM	7304	7300		154	F1	NA	1
137	F1	NA	1		154	F2	NA	2
137	F2	NA	2		154	F3	10	7
137	F3	NA	7		154	F4	15	14
137	F4	NA	14		154	F5	32	31
137	F5	NA	31		154	F6	93	63
137	F6	NA	63		154	F7	185	186
137	F7	NA	186		154	F8	365	365
137	F8	NA	365		154	F9	976	730
145	F2	3	2		154	FM	7306	7300
145	F3	8	7		155	F1	3	1
145	F4	16	14		155	F2	5	2
145	F5	41	31		155	F5	29	31
145	F6	93	63		155	F6	89	63
145	F7	186	186		155	F7	181	186
145	F8	396	365		155	F8	366	365
145	F9	1101	730		155	FM	7305	7300
145	FM	NA	7300		156	F1	2	1
149	F1	NA	1		156	F2	3	2
149	F4	NA	14		156	F3	8	7
149	F5	NA	31		156	F4	NA	14
149	F6	NA	63		156	F5	NA	31
149	F7	NA	186		156	F6	94	63
149	F8	NA	365		156	F7	NA	186
150	F1	3	1		156	F8	NA	365
150	F2	5	2		156	F9	NA	730
150	F3	NA	7		156	FM	7302	7300
150	F4	23	14		157	F1	2	1
150	F5	38	31		157	F2	NA	2
150	F6	NA	63		157	F3	NA	7
150	F7	205	186		157	F4	NA	14
150	F8	382	365		157	F5	NA	31
152	F1	3	1		157	F6	NA	63
152	F2	NA	2		157	F7	NA	186
152	F3	8	7		157	F8	NA	365
152	F4	15	14		157	FM	NA	7300
152	F5	29	31		16	F1	2	1
152	F6	NA	63		16	F2	NA	2
152	F7	182	186		16	F3	7	7
152	F8	379	365		16	F4	15	14
152	FM	7303	7300		16	F5	33	31
153	F2	4	2		16	F6	93	63
153	F3	7	7		16	F7	NA	186
153	F4	15	14		16	F8	367	365
153	F5	29	31		16	F9	1045	730
153	F6	67	63		16	FM	NA	7300
153	F7	182	186		160	F1	1	1
153	F8	NA	365		160	F2	2	2
160	F3	8	7		172	F9	972	730
160	F4	15	14		172	FM	7304	7300
160	F5	31	31		178	F1	3	1
160	F6	NA	63		178	F2	4	2
160	F7	187	186		178	F3	5	7
160	F8	365	365		178	F4	11	14
160	F9	969	730		178	F5	31	31
160	FM	7308	7300		178	F6	92	63
162	F1	1	1		178	F7	190	186
162	F3	8	7		178	F8	NA	365
162	F4	15	14		178	F9	929	730
162	F5	31	31		178	FM	7306	7300
162	F6	87	63		180	F1	2	1
162	F7	NA	186		180	F2	3	2
162	F8	369	365		180	F3	9	7
162	F9	NA	730		180	F4	15	14
162	FM	7303	7300		180	F5	NA	31
167	F3	8	7		180	F6	NA	63
167	F4	15	14		180	F7	184	186
167	F5	32	31		180	F8	367	365
167	F6	93	63		180	F9	NA	730
167	F7	191	186		181	F1	1	1
167	F8	366	365		181	F2	2	2
167	F9	1058	730		181	F3	4	7
167	FM	NA	7300		181	F4	15	14
168	F1	NA	1		181	F5	31	31
168	F2	NA	2		181	F6	93	63
168	F3	NA	7		181	F7	184	186
168	F4	NA	14		181	F8	366	365
168	F7	NA	186		181	F9	922	730
168	F8	NA	365		181	FM	NA	7300
168	F9	1015	730		19	F1	NA	1
168	FM	NA	7300		19	F2	3	2
171	F1	3	1		19	F3	NA	7
171	F2	3	2		19	F4	NA	14
171	F3	8	7		19	F5	NA	31
171	F4	18	14		19	F6	NA	63
171	F5	32	31		19	F7	NA	186
171	F6	95	63		19	F8	NA	365
171	F7	185	186		19	FM	7304	7300
171	F8	367	365		192	F1	2	1
171	F9	938	730		192	F2	3	2
172	F1	2	1		192	F3	8	7
172	F2	3	2		192	F4	15	14
172	F3	NA	7		192	F5	32	31
172	F4	15	14		192	F6	101	63
172	F5	31	31		192	F7	190	186
172	F6	NA	63		192	F8	366	365
172	F7	186	186		192	F9	927	730
172	F8	366	365		192	FM	NA	7300
194	F1	3	1		201	F9	NA	730
194	F4	17	14		201	FM	8036	7300
194	F5	46	31		203	F1	NA	1
194	F6	108	63		203	F2	5	2
194	F7	NA	186		203	F3	9	7
194	F8	432	365		203	F4	15	14
194	F9	NA	730		203	F5	31	31
194	FM	7321	7300		203	F8	367	365
195	F1	2	1		203	F9	876	730
195	F2	3	2		203	FM	NA	7300
195	F3	13	7		205	F1	2	1
195	F4	15	14		205	F2	2	2
195	F5	NA	31		205	F3	NA	7
195	F6	93	63		205	F4	NA	14
195	F7	186	186		205	F5	NA	31
195	F8	387	365		205	F6	NA	63
195	F9	997	730		205	F7	NA	186
199	F1	2	1		205	F8	369	365
199	F2	3	2		205	F9	940	730
199	F3	8	7		205	FM	NA	7300
199	F4	15	14		207	F1	2	1
199	F5	32	31		207	F2	3	2
199	F6	93	63		207	F3	8	7
199	F7	197	186		207	F6	93	63
199	F8	366	365		207	F7	185	186
199	F9	904	730		207	F8	367	365
2	F1	2	1		207	F9	922	730
2	F2	NA	2		208	F1	1	1
2	F4	15	14		208	F2	NA	2
2	F5	32	31		208	F3	12	7
2	F7	183	186		208	F4	16	14
2	F8	368	365		208	F5	33	31
2	FM	7310	7300		208	F6	93	63
200	F1	1	1		208	F7	184	186
200	F2	2	2		208	F8	366	365
200	F3	8	7		208	F9	898	730
200	F4	15	14		210	F2	4	2
200	F5	NA	31		210	F3	NA	7
200	F6	93	63		210	F4	16	14
200	F7	NA	186		210	F5	NA	31
200	F8	417	365		210	F6	93	63
200	FM	7302	7300		210	F7	NA	186
201	F1	NA	1		210	F8	371	365
201	F2	3	2		210	F9	NA	730
201	F3	8	7		210	FM	7306	7300
201	F4	15	14		214	F1	4	1
201	F5	33	31		214	F3	7	7
201	F6	94	63		214	F4	15	14
201	F7	NA	186		214	F5	32	31
201	F8	NA	365		214	F6	93	63
214	F7	458	186		23	F3	NA	7
214	F8	367	365		23	F4	15	14
214	F9	NA	730		23	F5	32	31
214	FM	7310	7300		23	F6	94	63
215	F1	4	1		23	F7	185	186
215	F3	9	7		23	F8	367	365
215	F4	15	14		23	FM	7303	7300
215	F5	36	31		233	F2	12	2
215	F6	92	63		233	F3	NA	7
215	F7	191	186		233	F5	NA	31
215	F8	365	365		233	F6	NA	63
215	FM	7305	7300		233	F7	NA	186
219	F1	1	1		233	F9	779	730
219	F2	3	2		234	F1	3	1
219	F3	8	7		234	F2	4	2
219	F4	15	14		234	F3	NA	7
219	F5	33	31		234	F4	15	14
219	F6	92	63		234	F5	31	31
219	F7	NA	186		234	F6	92	63
219	F8	367	365		234	F7	182	186
219	FM	7306	7300		234	F8	367	365
22	F1	1	1		234	F9	861	730
22	F2	4	2		234	FM	NA	7300
22	F3	8	7		245	F1	NA	1
22	F4	15	14		245	F2	NA	2
22	F5	33	31		245	F3	NA	7
22	F6	97	63		245	F4	15	14
22	F7	185	186		245	F5	33	31
22	F8	367	365		245	F6	93	63
22	FM	NA	7300		245	F7	184	186
220	F1	1	1		245	F8	367	365
220	F2	4	2		245	F9	733	730
220	F3	8	7		245	FM	NA	7300
220	F4	15	14		248	F2	NA	2
220	F5	35	31		248	F3	4	7
220	F6	95	63		248	F4	16	14
220	F7	187	186		248	F5	31	31
220	F8	368	365		248	F6	NA	63
220	FM	7308	7300		248	F7	187	186
226	F1	3	1		248	FM	7310	7300
226	F2	3	2		25	F1	5	1
226	F3	9	7		25	F2	NA	2
226	F4	19	14		25	F3	NA	7
226	F5	32	31		25	F4	19	14
226	F6	93	63		25	F5	NA	31
226	F7	185	186		25	F6	NA	63
226	F8	365	365		25	F7	184	186
226	F9	893	730		25	F8	368	365
23	F1	NA	1		262	F1	3	1
23	F2	7	2		262	F3	10	7
262	F4	16	14		283	F3	8	7
262	F5	33	31		283	F4	14	14
262	F6	92	63		283	F5	28	31
262	F7	157	186		283	F6	90	63
262	F8	7	365		283	F7	183	186
262	F9	NA	730		283	F8	366	365
262	FM	7310	7300		283	F9	733	730
266	F3	NA	7		283	FM	7306	7300
266	F4	NA	14		285	F1	NA	1
266	F5	NA	31		285	F3	6	7
266	F6	NA	63		285	F4	14	14
266	F7	NA	186		285	F5	29	31
266	F8	NA	365		285	F6	91	63
266	F9	NA	730		285	F7	182	186
266	FM	NA	7300		285	F8	366	365
268	F1	1	1		285	F9	740	730
268	F3	7	7		285	FM	NA	7300
268	F4	NA	14		287	F1	1	1
268	F5	NA	31		287	F2	2	2
268	F6	NA	63		287	F3	7	7
268	F8	NA	365		287	F4	NA	14
268	F9	NA	730		287	F5	NA	31
268	FM	NA	7300		287	F6	NA	63
272	F2	2	2		287	F7	NA	186
272	F3	9	7		287	F8	413	365
272	F4	14	14		287	F9	NA	730
272	F5	NA	31		287	FM	NA	7300
272	F6	91	63		290	F2	4	2
272	F7	182	186		290	F3	7	7
272	F8	369	365		290	F4	14	14
272	F9	724	730		290	F5	32	31
272	FM	7303	7300		290	F6	94	63
274	F1	NA	1		290	F7	185	186
274	F3	NA	7		290	F8	368	365
274	F4	21	14		290	F9	770	730
274	F5	32	31		290	FM	7304	7300
274	F6	90	63		294	F3	NA	7
274	F7	182	186		294	F4	NA	14
274	F8	365	365		294	F5	NA	31
274	F9	741	730		294	F6	NA	63
274	FM	NA	7300		294	F7	NA	186
280	F3	NA	7		294	F8	NA	365
280	F4	NA	14		294	F9	766	730
280	F5	NA	31		294	FM	NA	7300
280	F6	92	63		3	F1	2	1
280	F7	184	186		3	F2	3	2
280	F8	NA	365		3	F4	16	14
280	F9	NA	730		3	F5	30	31
280	FM	NA	7300		3	F7	183	186
283	F1	1	1		3	F8	367	365
3	FM	7315	7300		323	F1	3	1
30	F1	2	1		323	F2	5	2
30	F2	2	2		323	F3	8	7
30	F3	8	7		323	F4	15	14
30	F4	NA	14		323	F5	31	31
30	F5	NA	31		323	F6	92	63
30	F6	94	63		323	F7	179	186
30	F7	426	186		323	F8	366	365
30	F9	1085	730		323	F9	950	730
30	FM	7305	7300		323	FM	7307	7300
304	F3	NA	7		325	F1	3	1
304	F4	NA	14		325	F2	4	2
304	F5	NA	31		325	F3	7	7
304	F6	NA	63		325	F4	15	14
304	F7	NA	186		325	F5	32	31
304	F8	NA	365		325	F6	94	63
304	FM	NA	7300		325	F7	NA	186
309	F2	NA	2		325	F8	369	365
309	F3	9	7		325	F9	NA	730
309	F4	18	14		325	FM	NA	7300
309	F5	26	31		329	F1	1	1
309	F6	68	63		329	F2	2	2
309	F7	98	186		329	F3	7	7
309	F8	186	365		329	F4	15	14
309	FM	7310	7300		329	F5	30	31
310	F1	1	1		329	F6	92	63
310	F2	NA	2		329	F7	NA	186
310	F3	7	7		329	F8	366	365
310	F4	14	14		329	FM	7308	7300
310	F5	32	31		330	F1	2	1
310	F6	94	63		330	F2	3	2
310	F7	188	186		330	F3	8	7
310	F8	368	365		330	F4	17	14
310	FM	7304	7300		330	F5	32	31
312	F3	7	7		330	F6	93	63
312	F4	15	14		330	F7	183	186
312	F5	97	31		330	F8	366	365
312	F6	NA	63		330	F9	872	730
312	F7	186	186		330	FM	7308	7300
312	F8	NA	365		332	F1	2	1
316	F1	NA	1		332	F2	NA	2
316	F2	2	2		332	F3	8	7
316	F3	7	7		332	F4	16	14
316	F4	14	14		332	F5	31	31
316	F5	32	31		332	F6	92	63
316	F6	93	63		332	F7	182	186
316	F7	185	186		332	F8	366	365
316	F8	276	365		332	F9	NA	730
316	F9	NA	730		332	FM	7307	7300
316	FM	7306	7300		335	F2	NA	2
335	F3	NA	7		358	F7	182	186
335	F4	NA	14		358	F8	366	365
335	F5	NA	31		358	F9	NA	730
335	F6	93	63		358	FM	7309	7300
335	F7	183	186		361	F3	NA	7
335	F8	366	365		361	F4	NA	14
335	FM	NA	7300		361	F5	NA	31
336	F1	NA	1		361	F6	NA	63
336	F2	2	2		361	F7	NA	186
336	F3	NA	7		361	F8	NA	365
336	F4	NA	14		361	F9	NA	730
336	F5	NA	31		361	FM	NA	7300
336	F6	NA	63		363	F3	8	7
336	F7	NA	186		363	F4	13	14
336	F8	NA	365		363	F5	32	31
336	F9	NA	730		363	F6	80	63
336	FM	7303	7300		363	F7	185	186
340	F2	NA	2		363	F8	366	365
340	F3	18	7		363	F9	786	730
340	F4	NA	14		364	F3	NA	7
340	F5	NA	31		364	F4	15	14
340	F6	NA	63		364	F6	92	63
340	F7	NA	186		364	F7	181	186
340	F8	NA	365		364	F8	344	365
340	F9	NA	730		364	F9	792	730
340	FM	7307	7300		364	FM	NA	7300
341	F1	1	1		365	F3	8	7
341	F2	2	2		365	F4	15	14
341	F3	NA	7		365	F5	34	31
341	F4	NA	14		365	F6	104	63
341	F5	NA	31		365	F7	188	186
341	F6	NA	63		365	F8	372	365
341	F7	NA	186		365	F9	840	730
341	F8	NA	365		365	FM	7304	7300
341	F9	863	730		366	F3	NA	7
341	FM	7306	7300		366	F4	15	14
345	F1	8	1		366	F5	NA	31
345	F2	9	2		366	F6	1	63
345	F3	14	7		366	F7	180	186
345	F4	23	14		366	F8	367	365
345	F5	NA	31		366	F9	783	730
345	F6	84	63		366	FM	7306	7300
345	F7	187	186		37	F1	2	1
345	F8	350	365		37	F2	4	2
345	F9	883	730		37	F3	15	7
345	FM	7304	7300		37	F4	29	14
358	F3	9	7		37	F5	93	31
358	F4	15	14		37	F6	194	63
358	F5	33	31		37	F7	367	186
358	F6	93	63		37	FM	NA	7300
371	F3	8	7		396	F7	184	186
371	F4	15	14		396	F8	366	365
371	F5	32	31		396	F9	NA	730
371	F6	91	63		396	FM	7308	7300
371	F7	181	186		399	F3	9	7
371	F8	365	365		399	F4	15	14
371	F9	815	730		399	F5	31	31
371	FM	7307	7300		399	F7	184	186
372	F3	36	7		399	F9	791	730
372	F4	43	14		399	FM	7310	7300
372	F5	31	31		400	F3	NA	7
372	F6	91	63		400	F4	NA	14
372	F7	187	186		400	F5	NA	31
372	FM	7306	7300		400	F6	NA	63
373	F4	NA	14		400	F7	NA	186
373	F6	NA	63		400	F8	429	365
373	F7	NA	186		400	FM	NA	7300
373	F9	NA	730		405	F3	7	7
375	F3	8	7		405	F4	14	14
375	F4	15	14		405	F5	31	31
375	F5	29	31		405	F6	93	63
375	F6	81	63		405	F7	184	186
375	F7	182	186		405	F8	369	365
375	F9	781	730		405	F9	NA	730
382	F3	8	7		405	FM	NA	7300
382	F5	NA	31		407	F3	8	7
382	F6	NA	63		407	F4	15	14
382	F7	182	186		407	F5	32	31
382	F8	366	365		407	F6	93	63
382	F9	770	730		407	F7	185	186
382	FM	7309	7300		407	F8	366	365
392	F3	6	7		407	FM	7308	7300
392	F4	22	14		408	F3	NA	7
392	F6	93	63		408	F4	NA	14
392	F7	NA	186		408	F6	NA	63
392	F8	NA	365		408	F7	NA	186
392	F9	NA	730		408	F8	6	365
392	FM	7306	7300		408	F9	762	730
393	F3	7	7		408	FM	7306	7300
393	F4	14	14		409	F3	NA	7
393	F5	32	31		409	F4	15	14
393	F6	93	63		409	F5	32	31
393	F7	190	186		409	F6	93	63
393	F8	370	365		409	F7	180	186
393	F9	733	730		409	F8	NA	365
393	FM	7305	7300		409	F9	765	730
396	F3	8	7		409	FM	7308	7300
396	F4	14	14		41	F1	3	1
396	F5	31	31		41	F2	NA	2
396	F6	92	63		41	F3	NA	7
41	F4	NA	14		434	F4	15	14
41	F5	NA	31		434	F5	29	31
41	F6	NA	63		434	F6	93	63
41	F7	NA	186		434	F7	341	186
41	F8	NA	365		434	F8	366	365
41	FM	NA	7300		434	F9	786	730
411	F3	10	7		436	F3	8	7
411	F4	NA	14		436	F4	15	14
411	F5	NA	31		436	F5	32	31
411	F7	187	186		436	F6	93	63
411	F8	366	365		436	F7	183	186
411	F9	761	730		436	F8	366	365
417	F3	7	7		436	F9	764	730
417	F4	NA	14		437	F3	11	7
417	F5	3	31		437	F4	18	14
417	F6	94	63		437	F5	35	31
417	F7	192	186		437	F6	93	63
417	F8	372	365		437	F7	NA	186
417	F9	849	730		437	F8	366	365
417	FM	7307	7300		437	F9	751	730
421	F3	6	7		438	F3	NA	7
421	F4	17	14		438	F4	15	14
421	F5	33	31		438	F5	32	31
421	F6	96	63		438	F6	95	63
421	F7	218	186		438	F7	183	186
421	F8	NA	365		438	F8	366	365
421	F9	NA	730		442	F3	7	7
421	FM	7309	7300		442	F4	15	14
429	F3	8	7		442	F5	30	31
429	F4	46	14		442	F6	91	63
429	F5	NA	31		442	F7	184	186
429	F6	NA	63		442	F8	366	365
429	F7	NA	186		442	F9	NA	730
429	F8	NA	365		442	FM	7310	7300
432	F3	10	7		47	F1	1	1
432	F4	15	14		47	F2	NA	2
432	F5	2	31		47	F3	8	7
432	F6	93	63		47	F4	NA	14
432	F7	187	186		47	F5	32	31
432	F8	366	365		47	F6	93	63
432	F9	NA	730		47	F7	194	186
432	FM	7311	7300		47	F8	362	365
433	F3	8	7		47	FM	NA	7300
433	F4	16	14		49	F1	NA	1
433	F5	32	31		49	F2	NA	2
433	F6	103	63		49	F4	NA	14
433	F7	202	186		49	F5	NA	31
433	F8	397	365		49	F6	NA	63
433	F9	NA	730		49	F7	NA	186
434	F3	7	7		49	F8	NA	365
5	F2	4	2		517	F2	10	2
5	F4	NA	14		517	F3	17	7
5	F5	NA	31		517	F4	35	14
5	F6	NA	63		517	F5	35	31
5	F8	NA	365		517	F6	96	63
501	F1	1	1		517	F7	188	186
501	F2	2	2		517	F8	NA	365
501	F3	7	7		517	F9	1029	730
501	F4	14	14		517	FM	7310	7300
501	F5	33	31		518	F1	2	1
501	F6	93	63		518	F2	3	2
501	F7	185	186		518	F3	NA	7
501	F8	367	365		518	F4	14	14
501	FM	7306	7300		518	F5	32	31
502	F1	NA	1		518	F6	94	63
502	F2	2	2		518	F7	186	186
502	F3	7	7		518	F8	374	365
502	F4	14	14		518	F9	NA	730
502	F5	30	31		518	FM	7304	7300
502	F6	93	63		519	F1	1	1
502	F7	366	186		519	F2	2	2
502	F8	NA	365		519	F3	8	7
502	F9	1045	730		519	F4	14	14
502	FM	7305	7300		519	F5	32	31
505	F1	NA	1		519	F6	93	63
505	F2	NA	2		519	F7	185	186
505	F3	NA	7		519	F8	366	365
505	F4	14	14		519	FM	7309	7300
505	F5	NA	31		520	F1	3	1
505	F6	NA	63		520	F3	NA	7
505	F7	185	186		520	F5	NA	31
505	F8	366	365		520	F6	NA	63
508	F1	3	1		520	F7	556	186
508	F2	NA	2		520	F8	NA	365
508	F3	NA	7		520	FM	NA	7300
508	F4	NA	14		521	F2	3	2
508	F5	NA	31		521	F3	7	7
508	F6	NA	63		521	F4	15	14
508	F7	NA	186		521	F5	31	31
508	F8	358	365		521	F6	106	63
509	F2	2	2		521	F7	185	186
509	F3	7	7		521	F8	377	365
509	F4	14	14		521	F9	NA	730
509	F5	30	31		521	FM	7307	7300
509	F6	94	63		528	F1	NA	1
509	F7	185	186		528	F2	NA	2
509	F8	366	365		528	F3	NA	7
509	F9	990	730		528	F4	15	14
509	FM	7307	7300		528	F5	NA	31
517	F1	5	1		528	F6	100	63
528	F7	182	186		539	F8	366	365
528	F8	366	365		539	F9	862	730
528	F9	916	730		539	FM	7308	7300
528	FM	NA	7300		541	F1	NA	1
529	F1	NA	1		541	F2	NA	2
529	F2	NA	2		541	F3	10	7
529	F3	NA	7		541	F4	NA	14
529	F4	17	14		541	F5	32	31
529	F5	NA	31		541	F6	91	63
529	F6	NA	63		541	F7	182	186
529	F7	NA	186		541	F8	362	365
529	F8	NA	365		541	FM	7310	7300
529	F9	NA	730		547	F1	NA	1
529	FM	NA	7300		547	F2	NA	2
530	F1	NA	1		547	F3	NA	7
530	F2	NA	2		547	F4	NA	14
530	F3	9	7		547	F5	NA	31
530	F4	23	14		547	F6	93	63
530	F5	NA	31		547	F7	NA	186
530	F6	93	63		547	F8	NA	365
530	F7	183	186		547	FM	NA	7300
530	F8	366	365		55	F1	2	1
530	F9	918	730		55	F2	3	2
530	FM	NA	7300		55	F3	10	7
533	F1	NA	1		55	F4	15	14
533	F2	3	2		55	F5	31	31
533	F3	NA	7		55	F6	109	63
533	F4	NA	14		55	F7	185	186
533	F5	NA	31		55	F8	363	365
533	F6	NA	63		55	F9	970	730
533	F7	NA	186		551	F1	NA	1
533	F8	NA	365		551	F2	NA	2
533	F9	NA	730		551	F3	NA	7
533	FM	7309	7300		551	F4	15	14
535	F1	NA	1		551	F5	1	31
535	F2	NA	2		551	F6	1	63
535	F4	NA	14		551	F7	185	186
535	F5	NA	31		551	F8	356	365
535	F6	86	63		551	FM	NA	7300
535	F7	164	186		556	F2	5	2
535	F8	362	365		556	F3	NA	7
535	F9	853	730		556	F4	NA	14
535	FM	NA	7300		556	F5	NA	31
539	F1	NA	1		556	F6	NA	63
539	F2	NA	2		556	F7	NA	186
539	F3	NA	7		556	F8	NA	365
539	F4	14	14		556	FM	NA	7300
539	F5	NA	31		562	F1	NA	1
539	F6	95	63		562	F2	NA	2
539	F7	183	186		562	F3	8	7
562	F4	NA	14		58	F8	365	365
562	F5	NA	31		58	F9	957	730
562	F6	NA	63		58	FM	NA	7300
562	F7	NA	186		59	F2	3	2
562	F8	NA	365		59	F3	8	7
562	FM	7307	7300		59	F4	NA	14
563	F1	NA	1		59	F5	31	31
563	F2	2	2		59	F6	95	63
563	F3	NA	7		59	F7	184	186
563	F4	NA	14		59	F8	368	365
563	F5	34	31		59	F9	961	730
563	F6	93	63		59	FM	NA	7300
563	F7	186	186		61	F1	1	1
563	F8	368	365		61	F2	2	2
563	F9	772	730		61	F3	8	7
563	FM	NA	7300		61	F4	15	14
564	F1	1	1		61	F5	32	31
564	F2	2	2		61	F6	109	63
564	F3	NA	7		61	F7	190	186
564	F4	NA	14		61	F8	378	365
564	F5	NA	31		62	F1	4	1
564	F6	NA	63		62	F2	5	2
564	F7	NA	186		62	F3	8	7
564	F8	NA	365		62	F4	15	14
564	F9	699	730		62	F5	NA	31
564	FM	NA	7300		62	F6	94	63
57	F1	NA	1		62	F7	188	186
57	F2	NA	2		62	F8	366	365
57	F3	NA	7		62	FM	7308	7300
57	F4	NA	14		63	F1	1	1
57	F5	NA	31		63	F3	7	7
57	F6	NA	63		63	F4	14	14
57	F7	NA	186		63	F5	33	31
57	F8	NA	365		63	F6	95	63
57	FM	NA	7300		63	F7	189	186
572	F1	NA	1		63	F8	373	365
572	F2	NA	2		63	F9	949	730
572	F3	7	7		63	FM	NA	7300
572	F4	14	14		67	F2	2	2
572	F5	31	31		67	F3	NA	7
572	F6	93	63		67	F4	15	14
572	F7	182	186		67	F5	NA	31
572	F8	372	365		67	F6	NA	63
58	F1	31	1		67	F7	184	186
58	F2	2	2		67	F8	366	365
58	F3	7	7		67	FM	7302	7300
58	F4	15	14		70	F1	2	1
58	F5	31	31		70	F2	3	2
58	F6	93	63		70	F3	8	7
58	F7	184	186		70	F4	15	14
70	F5	31	31		73	F3	9	7
70	F6	93	63		73	F4	17	14
70	F7	186	186		73	F5	30	31
70	F8	370	365		73	F6	95	63
70	F9	947	730		73	F7	186	186
70	FM	7308	7300		73	F8	366	365
701	F3	NA	7		73	F9	NA	730
701	F5	NA	31		73	FM	7309	7300
701	F6	NA	63		732	F3	8	7
701	F7	183	186		732	F4	15	14
701	F8	358	365		732	F5	29	31
701	FM	7309	7300		732	F6	86	63
705	F3	NA	7		732	F7	183	186
705	F4	15	14		732	F8	370	365
705	F5	31	31		732	F9	NA	730
705	F6	NA	63		734	F3	8	7
705	F7	183	186		734	F4	13	14
705	F8	366	365		734	F5	43	31
705	FM	7308	7300		734	F6	83	63
706	F3	8	7		734	F7	185	186
706	F4	15	14		734	F8	NA	365
706	F5	33	31		734	F9	NA	730
706	F6	NA	63		734	FM	7310	7300
706	F7	182	186		738	F4	15	14
706	F8	375	365		738	F5	35	31
706	FM	7308	7300		738	F6	90	63
709	F4	15	14		738	F7	184	186
709	F5	35	31		738	F8	366	365
709	F6	66	63		738	F9	NA	730
709	F7	202	186		738	FM	7326	7300
709	F8	NA	365		76	F1	NA	1
709	F9	NA	730		76	F3	NA	7
709	FM	7315	7300		76	F4	1	14
71	F1	2	1		76	F5	32	31
71	F2	5	2		76	F6	NA	63
71	F3	8	7		76	F7	189	186
71	F4	14	14		76	F8	365	365
71	F5	27	31		76	FM	NA	7300
71	F6	96	63		78	F1	2	1
71	F7	188	186		78	F2	3	2
71	F8	367	365		78	F3	8	7
71	FM	7306	7300		78	F4	16	14
720	F5	NA	31		78	F5	32	31
720	F6	NA	63		78	F6	93	63
720	F7	NA	186		78	F7	185	186
720	F8	NA	365		78	F8	366	365
720	F9	NA	730		78	FM	NA	7300
720	FM	NA	7300		79	F1	2	1
73	F1	5	1		79	F2	3	2
73	F2	6	2		79	F3	NA	7
79	F4	16	14		810	F2	3	2
79	F5	NA	31		810	F3	8	7
79	F6	NA	63		810	F4	15	14
79	F8	NA	365		810	F5	29	31
80	F1	2	1		810	F6	85	63
80	F3	2	7		810	F7	183	186
80	F4	15	14		810	F8	365	365
80	F5	32	31		810	F9	734	730
80	F6	NA	63		810	FM	7303	7300
80	F7	380	186		811	F1	1	1
80	FM	NA	7300		811	F3	7	7
800	F2	NA	2		811	F4	14	14
800	F3	NA	7		811	F5	34	31
800	F4	NA	14		811	F6	97	63
800	F5	NA	31		811	FM	7307	7300
800	F6	NA	63		812	F1	1	1
800	F7	NA	186		812	F2	2	2
800	F8	NA	365		812	F3	NA	7
800	F9	NA	730		812	F4	16	14
800	FM	NA	7300		812	F5	32	31
801	F1	NA	1		812	F6	95	63
801	F2	2	2		812	F7	178	186
801	F3	7	7		812	F8	367	365
801	F4	14	14		812	F9	733	730
801	F5	31	31		812	FM	7309	7300
801	F6	92	63		813	F3	8	7
801	F7	184	186		813	F4	15	14
801	F8	366	365		813	F5	32	31
801	F9	745	730		813	F6	96	63
801	FM	7304	7300		813	F7	175	186
802	F2	4	2		813	F8	367	365
802	F3	9	7		813	F9	733	730
802	F4	13	14		813	FM	7309	7300
802	F5	30	31		814	F3	9	7
802	F6	92	63		814	F4	14	14
802	F7	183	186		814	F5	32	31
802	F8	364	365		814	F6	93	63
802	F9	738	730		814	F7	185	186
802	FM	7302	7300		814	F8	367	365
804	F1	NA	1		814	FM	7393	7300
804	F2	NA	2		818	F1	NA	1
804	F3	7	7		818	F3	2	7
804	F4	14	14		818	F4	NA	14
804	F5	32	31		818	F5	31	31
804	F6	91	63		818	F6	94	63
804	F7	184	186		818	F7	NA	186
804	F8	365	365		818	F8	366	365
804	F9	738	730		818	F9	737	730
804	FM	7307	7300		818	FM	NA	7300
810	F1	2	1		82	F1	2	1
82	F2	3	2		838	F9	747	730
82	F3	10	7		838	FM	7304	7300
82	F4	16	14		84	F1	2	1
82	F5	NA	31		84	F2	3	2
82	F7	152	186		84	F3	8	7
82	F8	361	365		84	F4	15	14
820	F1	1	1		84	F5	32	31
820	F2	4	2		84	F6	93	63
820	F3	8	7		84	F7	186	186
820	F4	17	14		84	F8	364	365
820	F5	31	31		84	FM	NA	7300
820	F6	93	63		840	F3	NA	7
820	F7	174	186		840	F4	NA	14
820	F8	367	365		840	F5	NA	31
820	F9	754	730		840	F6	NA	63
820	FM	7303	7300		840	F7	NA	186
822	F2	2	2		840	F8	NA	365
822	F3	NA	7		840	F9	NA	730
822	F4	NA	14		841	F3	NA	7
822	F6	97	63		841	F4	NA	14
822	F7	183	186		841	F5	NA	31
822	F8	366	365		841	F6	NA	63
822	F9	751	730		841	F7	NA	186
822	FM	NA	7300		841	F8	NA	365
830	F1	2	1		841	F9	NA	730
830	F2	NA	2		843	F2	NA	2
830	F3	NA	7		843	F3	7	7
830	F4	15	14		843	F4	15	14
830	F5	34	31		843	F5	32	31
830	F6	93	63		843	F6	95	63
830	F7	186	186		843	F7	185	186
830	F8	400	365		843	F8	367	365
830	F9	824	730		843	F9	872	730
830	FM	7316	7300		843	FM	7309	7300
831	F2	6	2		847	F3	12	7
831	F3	9	7		847	F4	17	14
831	F4	NA	14		847	F5	33	31
831	F5	NA	31		847	F6	96	63
831	F6	101	63		847	F7	182	186
831	F7	193	186		847	F8	365	365
831	F8	NA	365		847	F9	747	730
831	F9	NA	730		847	FM	NA	7300
831	FM	7309	7300		848	F2	3	2
838	F2	4	2		848	F3	NA	7
838	F3	7	7		848	F4	14	14
838	F4	NA	14		848	F5	NA	31
838	F5	33	31		848	F6	91	63
838	F6	93	63		848	F7	NA	186
838	F7	185	186		848	F8	NA	365
838	F8	367	365		848	F9	NA	730
848	FM	NA	7300
86	F1	1	1
86	F2	NA	2
86	F3	9	7
86	F4	15	14
86	F5	32	31
86	F6	93	63
86	F7	186	186
86	F8	368	365
86	FM	NA	7300
88	F1	3	1
88	F2	4	2
88	F3	NA	7
88	F4	NA	14
88	F5	NA	31
88	F6	NA	63
88	F7	96	186
88	F8	NA	365
88	FM	7305	7300
89	F1	1	1
89	F2	3	2
89	F3	NA	7
89	F4	14	14
89	F5	NA	31
89	F6	NA	63
89	F7	NA	186
89	FM	7305	7300
9	F3	NA	7
9	F4	NA	14
9	F5	NA	31
9	F7	NA	186
9	F8	NA	365
92	F1	1	1
92	F3	9	7
92	F4	20	14
92	F5	37	31
92	F6	93	63
92	F7	187	186
92	F8	366	365
92	F9	1053	730
92	FM	7310	7300
96	F1	3	1
96	F2	4	2
96	F3	NA	7
96	F4	NA	14
96	F5	NA	31
96	F7	184	186
96	F8	366	365
NA: not available

## Sheet: Table S2
Table S2. ITS validation through blastN using reference genomes of dominant bifidobacteria in infant gut
NCBI reference accession	NCBI reference species	Hits vs ITS bacterial database	Start	End	E-value	Bitscore	Pident
GCF_000172135.1	Bifidobacterium dentium	GCA_900105745#[Prokaryote_Bifidobacterium#dentium]	1	5047	0	9321	100
		GCA_900105745#[Prokaryote_Bifidobacterium#dentium]	1	5047	0	9321	100
		GCA_900105745#[Prokaryote_Bifidobacterium#dentium]	1	5047	0	9321	100
		GCA_900105745#[Prokaryote_Bifidobacterium#dentium]	1	5047	0	9321	100
GCF_000196555.1	Bifidobacterium longum subsp. longum	GCA_900104835#[Prokaryote_Bifidobacterium#longum]	1	5738	0	10597	100
		GCA_900104835#[Prokaryote_Bifidobacterium#longum]	2277	5738	0	6394	100
		GCA_900104835#[Prokaryote_Bifidobacterium#longum]	2329	5738	0	6298	100
		GCA_900104835#[Prokaryote_Bifidobacterium#longum]	2342	5738	0	6216	99.706
		GCA_900104835#[Prokaryote_Bifidobacterium#longum]	1	1886	0	3406	99.258
		GCA_900104835#[Prokaryote_Bifidobacterium#longum]	1	1833	0	3230	98.425
		GCA_900104835#[Prokaryote_Bifidobacterium#longum]	1	1884	0	3241	97.678
GCF_002282915.1	Bifidobacterium pseudolongum	GCA_002282915#[Prokaryote_Bifidobacterium#pseudolongum]	1	5139	0	9491	100
		GCA_002282915#[Prokaryote_Bifidobacterium#pseudolongum]	1	5139	0	9297	99.339
		GCA_002282915#[Prokaryote_Bifidobacterium#pseudolongum]	1	5139	0	9273	99.261
		GCA_002282915#[Prokaryote_Bifidobacterium#pseudolongum]	1	5139	0	9269	99.241
GCF_000273525.1	Bifidobacterium bifidum	GCA_000273525#[Prokaryote_Bifidobacterium#bifidum]	1	6640	0	12262	100
		GCA_000273525#[Prokaryote_Bifidobacterium#bifidum]	1	1875	0	3463	100
		GCA_000273525#[Prokaryote_Bifidobacterium#bifidum]	3227	6640	0	6300	99.971
		GCA_000273525#[Prokaryote_Bifidobacterium#bifidum]	3255	6640	0	6248	99.97
		GCA_000273525#[Prokaryote_Bifidobacterium#bifidum]	1	1816	0	3186	98.353
GCF_001281425.1	Bifidobacterium breve	GCA_001281425#[Prokaryote_Bifidobacterium#breve]	1	5785	0	10683	100
		GCA_001281425#[Prokaryote_Bifidobacterium#breve]	4044	5785	0	3217	100
		GCA_001281425#[Prokaryote_Bifidobacterium#breve]	1	3350	0	6181	99.97
		GCA_001281425#[Prokaryote_Bifidobacterium#breve]	1	3350	0	6181	99.97
		GCA_001281425#[Prokaryote_Bifidobacterium#breve]	3894	5785	0	3227	97.381
GCF_003030905.1	Bifidobacterium adolescentis	GCA_000010425#[Prokaryote_Bifidobacterium#adolescentis]	1	5045	0	9317	100
		GCA_000010425#[Prokaryote_Bifidobacterium#adolescentis]	1	5045	0	9212	99.643
GCF_020541885.1	Bifidobacterium pseudocatenulatum	GCA_001686065#[Prokaryote_Bifidobacterium#pseudocatenulatum]	7022	1	0	12630	99.146
		GCA_001686065#[Prokaryote_Bifidobacterium#pseudocatenulatum]	3516	1	0	6283	98.949
		GCA_001686065#[Prokaryote_Bifidobacterium#pseudocatenulatum]	3458	1	0	6250	99.307
		GCA_001686065#[Prokaryote_Bifidobacterium#pseudocatenulatum]	3434	1	0	6181	99.157
		GCA_001686065#[Prokaryote_Bifidobacterium#pseudocatenulatum]	3434	1	0	6113	98.781
		GCA_001686065#[Prokaryote_Bifidobacterium#pseudocatenulatum]	8745	7023	0	3147	99.652
		GCA_001686065#[Prokaryote_Bifidobacterium#pseudocatenulatum]	8745	7023	0	3142	99.594
		GCA_001686065#[Prokaryote_Bifidobacterium#pseudocatenulatum]	8745	7023	0	3142	99.594
		GCA_001686065#[Prokaryote_Bifidobacterium#pseudocatenulatum]	8745	7023	0	3142	99.594
		GCA_001686065#[Prokaryote_Bifidobacterium#pseudocatenulatum]	8745	7023	0	3142	99.594
		GCA_001686065#[Prokaryote_Bifidobacterium#pseudocatenulatum]	6768	7022	9.73e-108	405	95.294
GCF_000771065.1	Bifidobacterium tsurumiense	GCA_000741765#[Prokaryote_Bifidobacterium#tsurumiense]	1171	5065	0	7193	100
		GCA_000741765#[Prokaryote_Bifidobacterium#tsurumiense]	1	1140	0	2106	100

## Sheet: Table S3
Table S3 Averaged relative abundance of Bifidobacterium (sub)species with standard deviation and confidence interval.
(sub)Species	Average relative abundance	Standard deviation	Confidence interval
Bifidobacterium adolescentis	0.12	0.169	0.009
Bifidobacterium aesculapii	0	0	0
Bifidobacterium angulatum	0	0.01	0
Bifidobacterium animalis subsp lactis	0.014	0.054	0.003
Bifidobacterium anseris	0	0.004	0
Bifidobacterium aquikefiri	0	0	0
Bifidobacterium asteroides	0	0.001	0
Bifidobacterium biavatii	0	0.001	0
Bifidobacterium bifidum	0.036	0.081	0.004
Bifidobacterium boum	0	0.002	0
Bifidobacterium breve	0.306	0.289	0.015
Bifidobacterium callitrichos	0	0.001	0
Bifidobacterium catenulatum	0.028	0.101	0.005
Bifidobacterium choerinum	0	0.002	0
Bifidobacterium crudilactis	0	0.002	0
Bifidobacterium dentium	0.041	0.133	0.007
Bifidobacterium eulemuris	0	0	0
Bifidobacterium gallinarum	0.001	0.008	0
Bifidobacterium italicum	0	0	0
Bifidobacterium kashiwanohense	0.009	0.044	0.002
Bifidobacterium longum subsp infantis	0.008	0.063	0.003
Bifidobacterium longum subsp longum	0.235	0.249	0.013
Bifidobacterium longum subsp suis	0.05	0.136	0.007
Bifidobacterium longum subspp	0.001	0.019	0.001
Bifidobacterium magnum	0.008	0.019	0.001
Bifidobacterium margollesii	0	0	0
Bifidobacterium merycicum	0	0	0
Bifidobacterium mongoliense	0	0.004	0
Bifidobacterium parmae	0	0.001	0
Bifidobacterium pseudocatenulatum	0.018	0.079	0.004
Bifidobacterium pseudolongum subsp globosum	0.053	0.088	0.004
Bifidobacterium pseudolongum subsp pseudolongum	0.018	0.031	0.002
Bifidobacterium pseudolongum subspp	0.003	0.013	0.001
Bifidobacterium reuteri	0	0.003	0
Bifidobacterium saguini	0	0	0
Bifidobacterium scardovii	0.007	0.057	0.003
Bifidobacterium thermacidophilum subsp porcinum	0	0.001	0
Bifidobacterium thermacidophilum subsp thermacidophilum	0	0.001	0
Bifidobacterium thermophilum	0.001	0.005	0
Bifidobacterium tissieri	0	0.001	0
Bifidobacterium tsurumiense	0	0.003	0
Putative new bacterial species	0.043	0.113	0.006

## Sheet: Table S4
Table S4 Prevalence and relative abundance of different Bifidobacterium species in response to various feeding mode.
Full Pool Data		Cluster Size	Average relative abundance			Max			Absolute Prevalence (Inside Group)			Relative Prevalence (Inside Group)
			710	659	273	710	659	273	710	659	273	710	659	273
Prevalence	Nr.	Taxa ID	Formula & Mix	All Feed Type	Breast & Mix	Formula & Mix	All Feed Type	Breast & Mix	Formula & Mix	All Feed Type	Breast & Mix	Formula & Mix Vs Breast & Mix	Formula & Mix Vs All Feed Type	All Feed Type Vs Breast & Mix
0.9178	1507	B. breve	0.2681	0.3225	0.2937	1	1	1	0.9239	0.9059	0.9304	-0.00694	0.0199	-0.02632
0.8989	1476	B. longum subsp longum	0.2373	0.2358	0.2319	1	1	0.9866	0.9211	0.8756	0.8974	0.0264	0.05203	-0.02437
0.7674	1260	B. adolescentis	0.1457	0.146	0.1251	1	1	0.9827	0.7986	0.7481	0.7326	0.09008	0.06749	0.02116
0.5987	983	B. pseudolongum subsp globosum	0.0524	0.0492	0.0446	0.8111	0.9406	0.8718	0.6282	0.5812	0.5641	0.11357	0.08084	0.03028
0.5834	958	B. bifidum	0.0276	0.0434	0.0323	0.804	0.9893	0.5858	0.5901	0.5797	0.5751	0.02617	0.01807	0.00795
0.4927	809	Putative new bacterial species	0.0432	0.0376	0.0476	1	0.7425	1	0.5085	0.4886	0.4615	0.10164	0.04059	0.05867
0.4872	800	B. longum subsp suis	0.0515	0.0417	0.0591	1	0.9553	1	0.507	0.4476	0.5311	-0.04536	0.13268	-0.15719
0.4476	735	B. pseudolongum subsp pseudolongum	0.0178	0.018	0.017	0.2788	0.4664	0.5	0.4831	0.4264	0.4066	0.18816	0.13296	0.04872
0.4233	695	B. dentium	0.043	0.0247	0.0582	1	0.987	1	0.4704	0.3536	0.4689	0.00332	0.33051	-0.24591
0.2881	473	B. animalis subsp lactis	0.0158	0.009	0.0146	0.9763	0.2225	0.9831	0.3282	0.258	0.2564	0.27986	0.27214	0.00607
0.271	445	B. catenulatum	0.0378	0.0234	0.0121	1	0.5717	0.5	0.3028	0.258	0.2198	0.37782	0.17386	0.17375
0.2479	407	B. magnum	0.0079	0.0079	0.0056	0.138	0.331	0.0852	0.269	0.2413	0.2088	0.28844	0.11497	0.15558
0.1991	327	B. pseudocatenulatum	0.0149	0.0181	0.0274	0.9161	0.7474	0.7547	0.2	0.2064	0.1795	0.11429	-0.03088	0.14979
0.1139	187	B. kashiwanohense	0.009	0.0102	0.0088	0.7731	1	0.6038	0.1099	0.1259	0.0952	0.15352	-0.12774	0.32246
0.1035	170	B. pseudolongum subspp	0.0034	0.0028	0.0018	0.3009	0.1989	0.1502	0.1211	0.1047	0.0549	1.20451	0.15685	0.90561
0.0761	125	B. longum subsp infantis	0.0117	0.0032	0.0027	1	0.3922	0.1729	0.0859	0.0744	0.0549	0.56366	0.15548	0.35326
0.0408	67	B. scardovii	0.0078	0.0026	0.0097	0.9775	0.5665	0.78	0.0493	0.0303	0.044	0.12148	0.6243	-0.30956
0.0384	63	B. thermophilum	0.001	0.0006	0.0002	0.1429	0.0223	0.0257	0.0507	0.0364	0.011	3.61408	0.39225	2.31411
0.0298	49	B. longum subspp	0.0009	0.0005	0.0042	0.3119	0.0283	0.59	0.0239	0.0288	0.0476	-0.49718	-0.16953	-0.39454
0.0164	27	B. mongoliense	0.0006	0.0001	0.0002	0.1348	0.0424	0.0142	0.0268	0.0061	0.0147	0.82641	3.4088	-0.58574
0.0164	27	B. gallinarum	0.0003	0.0008	0.0005	0.0459	0.2312	0.0658	0.0155	0.0137	0.0256	-0.39577	0.13443	-0.46737
0.014	23	B. reuteri	0.0004	0.0002	0.0003	0.0427	0.0254	0.0268	0.0183	0.0091	0.0147	0.24965	1.01103	-0.3786
0.0097	16	B. crudilactis	0.0002	0.0002	0	0.0319	0.0526	0.0132	0.0141	0.0076	0.0037	2.84507	0.85634	1.07132
0.0097	16	B. angulatum	0.001	0.0004	0.0019	0.1557	0.126	0.3343	0.0099	0.0076	0.0147	-0.32711	0.29944	-0.48217
0.0085	14	B. thermacidophilum subsp thermacidophilum	0.0001	0.0001	0.0001	0.0206	0.0143	0.0153	0.0085	0.0091	0.0073	0.15352	-0.07183	0.24279
0.0043	7	B. anseris	0.0001	0.0003	0.0001	0.0239	0.1111	0.0204	0.0042	0.003	0.0073	-0.42324	0.39225	-0.58574
0.0037	6	B. parmae	0.0001	0	0	0.0323	0.0164	0.0134	0.0056	0.0015	0.0037	0.53803	2.71268	-0.58574
0.0037	6	B. choerinum	0.0001	0.0001	0.0001	0.0197	0.0556	0.0295	0.0056	0.0015	0.0037	0.53803	2.71268	-0.58574
0.003	5	B. asteroides	0	0.0001	0.0001	0	0.014	0.0125	0	0.0046	0.0073	Formula&Mix_ND	Formula&Mix_ND	-0.3786
0.0018	3	B. callitrichos	0	0	0	0.012	0.0119	0	0.0028	0.0015	0	Breast&Mix_ND	0.85634	Breast&Mix_ND
0.0018	3	B. biavatii	0	0	0	0.0145	0.0144	0	0.0028	0.0015	0	Breast&Mix_ND	0.85634	Breast&Mix_ND
0.0018	3	B. saguini	0	0.0001	0	0.0131	0.0217	0	0.0014	0.003	0	Breast&Mix_ND	-0.53592	Breast&Mix_ND
0.0018	3	B. thermacidophilum subsp porcinum	0.0001	0	0.0001	0.0402	0.0145	0.0145	0.0014	0.0015	0.0037	-0.61549	-0.07183	-0.58574
0.0012	2	B. aquikefiri	0	0	0.0001	0.011	0	0.0149	0.0014	0	0.0037	-0.61549	AllFeedType_ND	AllFeedType_ND
0.0012	2	B. boum	0.0001	0	0	0.0588	0	0	0.0028	0	0	Breast&Mix_ND	AllFeedType_ND	Both_ND
0.0012	2	B. tsurumiense	0	0.0002	0	0	0.1194	0	0	0.003	0	Both_ND	Formula&Mix_ND	Breast&Mix_ND
0.0012	2	B. italicum	0	0	0	0.0108	0	0	0.0028	0	0	Breast&Mix_ND	AllFeedType_ND	Both_ND
0.0006	1	B. aesculapii	0	0	0	0.0111	0	0	0.0014	0	0	Breast&Mix_ND	AllFeedType_ND	Both_ND
0.0006	1	B. eulemuris	0	0	0	0.0152	0	0	0.0014	0	0	Breast&Mix_ND	AllFeedType_ND	Both_ND
0.0006	1	B. merycicum	0	0	0	0.0152	0	0	0.0014	0	0	Breast&Mix_ND	AllFeedType_ND	Both_ND
0.0006	1	B. tissieri	0	0	0	0	0.0308	0	0	0.0015	0	Both_ND	Formula&Mix_ND	Breast&Mix_ND
0.0006	1	B. margollesii	0	0.0001	0	0	0.0412	0	0	0.0015	0	Both_ND	Formula&Mix_ND	Breast&Mix_ND
Formula & mix indicates that in the first days it had a hybrid diet, and then immediately changed to formula-only. Breast & mix means that it underwent breast fed-only in the first days of life, and then changed over time to a hybrid diet. All-feed types are those cases in which all three types of feed have been used in the time course analysed, therefore breast fed-only early, then mix-feeding a…

## Sheet: Table S5
Table S5 P values of changed Bifidobacterium (sub)species per time point
P-values	F1 vs F2	F2 vs F3	F3 vs F4	F4 vs F5	F5 vs F6	F6 vs F7	F7 vs F8	F8 vs F9	F1 vs F3	F1 vs F5	F1 vs F9
B. adolescentis	0.77358	0.168802	0.69066	0.896978	0.37748	0.990226	0.126925	1.95e-05	0.00848475	3.67e-06	0.252881
B. aesculapii	0.752066	NA	NA	NA	NA	NA	NA	NA	0.469131	0.378827	0.347891
B. angulatum	NA	NA	NA	NA	NA	NA	0.521018	0.204749	NA	NA	0.347891
B. animalis subsp lactis	0.752066	0.168802	0.69066	0.985054	0.37748	0.822735	0.521018	0.411613	0.00571928	8.25318e-06	4.33299e-06
B. anseris	NA	0.527617	0.69066	NA	0.710764	0.485448	NA	NA	0.469131	0.160782	NA
B. aquikefiri	0.752066	0.509989	NA	NA	NA	NA	NA	NA	0.469131	NA	NA
B. asteroides	0.958305	0.509989	0.69066	0.896978	NA	NA	NA	NA	0.469131	0.378827	0.347891
B. biavatii	NA	0.509989	0.69066	NA	NA	NA	NA	NA	0.667983	0.378827	NA
B. bifidum	0.958305	0.294414	0.997146	0.985054	0.977235	0.485448	0.295451	0.791507	0.34608	0.012628	0.0515969
B. boum	NA	NA	NA	NA	NA	NA	NA	NA	NA	NA	NA
B. breve	0.958305	0.511286	0.958574	0.985054	0.790858	0.518638	0.693103	7.98e-07	0.34608	0.0582446	1.72539e-08
B. callitrichos	NA	0.527617	0.69066	NA	0.710764	0.485448	NA	NA	0.469131	0.378827	NA
B. catenulatum	0.932381	0.75152	0.69066	0.896978	1	0.703457	0.108918	0.381064	0.766233	0.0208143	0.307285
B. choerinum	0.752066	0.75152	0.69066	NA	NA	NA	NA	NA	1	0.378827	NA
B. crudilactis	0.932381	0.509989	1	0.896978	0.710764	0.485448	NA	NA	0.667983	0.62923	0.347891
B. dentium	0.958305	0.534702	0.749491	0.985054	1	0.485448	0.693103	0.207721	0.34608	0.277984	2.53408e-05
B. eulemuris	NA	NA	NA	NA	NA	NA	NA	NA	NA	NA	NA
B. gallinarum	0.752066	0.509989	1	0.896978	0.710764	0.485448	0.693103	0.996598	0.376093	0.10078	0.573935
B. italicum	NA	NA	NA	NA	NA	0.485448	0.521018	NA	NA	NA	NA
B. kashiwanohense	0.958305	0.651796	0.968314	0.985054	0.37748	0.611847	0.0494178	0.204749	0.547516	0.62923	0.0591248
B. longum subsp infantis	0.77358	0.509989	0.69066	0.896978	0.901582	0.822735	0.213226	0.791507	0.376093	0.0238676	0.000972222
B. longum subsp longum	0.958305	0.509989	0.958574	0.896978	1	0.378551	0.848323	0.204749	0.667983	0.207047	0.00469871
B. longum subsp suis	0.752066	0.534702	0.69066	0.985054	0.37748	0.326576	0.57352	0.204749	0.34608	0.0208143	0.000190977
B. longum subspp	NA	0.509989	0.968314	0.985054	1	0.326576	0.213226	0.411613	0.469131	0.10078	0.347891
B. magnum	0.752066	0.223038	1	0.896978	0.737892	0.326576	0.515505	0.996598	0.0138361	1.68345e-05	6.49299e-05
B. margollesii	NA	NA	NA	NA	NA	NA	NA	NA	NA	NA	NA
B. merycicum	NA	NA	NA	NA	NA	NA	NA	NA	NA	NA	NA
B. mongoliense	0.932381	0.509989	1	0.896978	0.496376	0.485448	0.521018	NA	0.376093	0.764217	0.347891
B. parmae	0.752066	0.527617	0.69066	NA	NA	NA	NA	NA	1	0.260999	0.264801
B. pseudocatenulatum	0.936929	0.509989	1	0.896978	0.737892	0.671868	0.594156	0.207721	0.469131	0.0582446	0.921989
B. pseudolongum subsp globosum	0.752066	0.168802	0.69066	0.896978	0.37748	0.485448	0.172201	0.991385	0.00571928	1.74994e-09	2.23547e-09
B. pseudolongum subsp pseudolongum	0.752066	0.155579	0.69066	0.896978	0.37748	0.485448	0.521018	0.941404	0.00285447	5.94131e-10	2.23547e-09
B. pseudolongum subspp	0.77358	0.527617	0.958574	0.896978	1	0.485448	0.650815	0.996598	0.376093	0.118451	0.013467
B. reuteri	0.958305	0.550165	0.69066	0.896978	1	0.485448	NA	NA	0.815746	0.370165	0.0877382
B. saguini	0.752066	0.527617	0.69066	NA	NA	NA	NA	NA	1	0.378827	0.347891
B. scardovii	0.752066	0.509989	0.69066	0.985054	0.37748	0.602822	0.774875	0.350669	0.667983	0.947724	0.0877382
B. thermacidophilum subsp porcinum	0.958305	0.509989	NA	NA	NA	NA	NA	NA	0.376093	0.260999	0.347891
B. thermacidophilum subsp thermacidophilum	0.958305	0.509989	0.69066	0.985054	1	1	0.521018	NA	0.34608	0.696961	0.347891
B. thermophilum	0.752066	0.509989	1	0.896978	0.737892	0.485448	0.693103	0.996598	0.667983	0.10078	0.0589989
B. tissieri	0.752066	0.509989	NA	NA	NA	NA	NA	NA	NA	NA	NA
B. tsurumiense	NA	NA	NA	NA	NA	NA	NA	NA	0.469131	NA	NA
Putative new bacterial species	0.752066	0.168802	0.69066	0.896978	1	0.485448	0.0467239	0.358708	0.00870725	6.28603e-06	0.102847

## Sheet: Table S6
Table S6 Correlation coefficient and P values with maternal bifidobacterial population
infants	mother	Pearson correlation coeffecient	P-value
F1	FM	0.783099	8.84779e-10
F2	FM	0.763261	4.17e-09
F3	FM	0.759588	5.46604e-09
F4	FM	0.768708	2.76608e-09
F5	FM	0.748313	1.21872e-08
F6	FM	0.712802	1.18435e-07
F7	FM	0.745066	1.52356e-08
F8	FM	0.833891	7.04659e-12
F9	FM	0.95187	0
F1-F9 refers to samples collected from infants at different timepoints, i.e., around 1 day, 2 days, 1 week, 2 weeks, 1 month, 2 months, 6 months, 1 year and 2 years after birth; FM refers to samples collected from infants’ mother.

## Sheet: Table S7
Table S7 Variance explained by variables at given timepoints
Variance explained	1 month	2 month	6 month	1 year	2 years
Antibiotic during first week of life (yes/no)	0.00279354	0.00498509	0.00457745	0.00440242	0.0137386
Delivery mode	0.00621311	0.0106952	0.00290564	0.00705621	0.005499
Feeding mode	0.00642398	0.0121731	0.0157585	0.0154878	NA
Subject identity	0.485496	0.972147	0.976758	0.973054	0.980762
Varaiance writen in dark blue of significant contribution to the variation in the bifidobacterial population at indicated time period. Subject identity: variance explained by subject specific identity.
NA: not applicable

## Sheet: Table S8
Table S8 Significant different Bifidobacterium (sub)species between delivery modes
(sub)species	1 month comparison P-values	2 month comparison P-values
Bifidobacterium animalis subsp lactis	0.00130597	0.78329
Bifidobacterium magnum	0.00130597	0.965765
Bifidobacterium pseudolongum subsp globosum	0.00130597	0.919582
Bifidobacterium pseudolongum subspp	0.00172959	0.919582
Bifidobacterium pseudolongum subsp pseudolongum	0.00661418	0.822149
Bifidobacterium dentium	0.00773664	0.135865
Bifidobacterium longum subsp longum	0.0135874	0.78329
Bifidobacterium crudilactis	0.0213375	0.609809
Putative new bacterial species	0.0213375	0.78329
Bifidobacterium thermophilum	0.0261841	0.919582
Bifidobacterium longum subsp suis	0.038986	0.609809
Bifidobacterium adolescentis	0.0518347	0.78329
Bifidobacterium longum subsp infantis	0.0930155	0.609809
Bifidobacterium mongoliense	0.15532	NA
Bifidobacterium anseris	0.204225	0.78329
Bifidobacterium boum	0.375864	0.609809
Bifidobacterium aquikefiri	0.673346	NA
Bifidobacterium gallinarum	0.673346	0.78329
Bifidobacterium scardovii	0.673346	0.609809
Bifidobacterium tsurumiense	0.673346	NA
Bifidobacterium parmae	0.692629	NA
Bifidobacterium aesculapii	0.700915	NA
Bifidobacterium breve	0.700915	0.78329
Bifidobacterium eulemuris	0.700915	NA
Bifidobacterium kashiwanohense	0.700915	0.625641
Bifidobacterium merycicum	0.700915	NA
Bifidobacterium tissieri	0.700915	NA
Bifidobacterium bifidum	0.71188	0.78329
Bifidobacterium pseudocatenulatum	0.722991	0.78329
Bifidobacterium callitrichos	0.741755	0.78329
Bifidobacterium longum subspp	0.741755	0.609809
Bifidobacterium saguini	0.741755	NA
Bifidobacterium thermacidophilum subsp thermacidophilum	0.741755	0.78329
Bifidobacterium asteroides	0.826575	NA
Bifidobacterium choerinum	0.826575	NA
Bifidobacterium reuteri	0.856942	0.665044
Bifidobacterium biavatii	0.991465	NA
Bifidobacterium catenulatum	0.991465	0.78329
Bifidobacterium thermacidophilum subsp porcinum	0.991465	NA
Bifidobacterium angulatum	NA	NA
Bifidobacterium italicum	NA	NA
Bifidobacterium margollesii	NA	NA

## Sheet: Table S9
Table S9 Significant different Bifidobacterium (sub)species between feeding modes
P-values	Breast-fed infants vs formula-fed infants								Breast-fed infants vs infants fed with combineatin of breastmilk and formula
	F1	F2	F3	F4	F5	F6	F7	F8	F1	F2	F3	F4	F5	F6	F7	F8
Bifidobacterium adolescentis	0.365153	0.94414	0.487602	0.3966	0.459972	0.0072184	0.0724281	0.78151	0.743579	0.670778	0.948631	0.948356	0.891343	0.921198	0.862292	0.80353
Bifidobacterium aesculapii	0.48719	NA	NA	NA	NA	NA	NA	NA	NA	NA	NA	NA	NA	NA	NA	NA
Bifidobacterium angulatum	NA	NA	NA	NA	NA	NA	NA	0.879032	NA	NA	NA	NA	NA	NA	NA	NA
Bifidobacterium animalis subsp lactis	0.443218	0.650657	0.29988	0.186154	0.459972	0.533946	0.943298	0.78151	0.572878	0.465564	0.948631	0.948356	0.891343	0.826551	0.862292	0.811331
Bifidobacterium anseris	0.838214	0.712434	0.489024	NA	NA	0.518435	NA	NA	0.851034	0.00177004	0.948631	NA	NA	NA	NA	NA
Bifidobacterium aquikefiri	NA	0.718443	0.487602	NA	NA	NA	NA	NA	NA	0.885125	NA	NA	NA	NA	NA	NA
Bifidobacterium asteroides	0.529726	0.718443	NA	0.496324	NA	NA	NA	0.879032	0.851034	0.885125	NA	0.948356	NA	NA	NA	NA
Bifidobacterium biavatii	0.48719	NA	0.920913	NA	NA	NA	NA	NA	NA	NA	0.948631	NA	NA	NA	NA	NA
Bifidobacterium bifidum	0.195958	0.94414	0.761125	0.5515	0.597358	0.878798	0.960143	0.0155375	0.572878	0.885125	0.982759	0.948356	0.891343	0.826551	1	0.80353
Bifidobacterium boum	NA	NA	NA	0.5515	NA	0.518435	NA	NA	NA	NA	NA	NA	NA	NA	NA	NA
Bifidobacterium breve	0.443218	0.650657	0.814677	0.904327	0.459972	0.223183	0.811269	0.728615	0.574761	0.531013	0.948631	0.948356	0.891343	0.943983	0.902058	0.80353
Bifidobacterium callitrichos	0.529726	NA	0.487602	NA	NA	0.518435	NA	NA	0.851034	NA	NA	NA	NA	NA	NA	NA
Bifidobacterium catenulatum	0.365153	0.997477	0.489024	0.3966	0.505338	0.274947	0.115965	0.555876	0.574761	0.885125	0.948631	0.948356	0.891343	0.827172	0.902058	0.80353
Bifidobacterium choerinum	0.529726	0.650657	0.489024	0.5515	NA	NA	NA	NA	0.851034	NA	0.948631	NA	NA	NA	NA	NA
Bifidobacterium crudilactis	0.908886	0.94414	0.29988	0.3966	0.756696	0.533946	NA	NA	0.851034	0.885125	NA	NA	0.891343	0.921198	NA	NA
Bifidobacterium dentium	0.683147	0.94414	0.390175	0.807251	0.459972	0.166029	0.811269	0.904316	0.851034	0.885125	0.948631	0.948356	0.891343	0.826551	0.862292	0.80353
Bifidobacterium eulemuris	NA	0.712434	NA	NA	NA	NA	NA	NA	NA	NA	NA	NA	NA	NA	NA	NA
Bifidobacterium gallinarum	0.908886	0.922312	0.621355	0.496324	NA	0.321543	0.811269	0.879032	0.851034	0.885125	0.948631	0.948356	NA	NA	0.902058	NA
Bifidobacterium italicum	NA	NA	NA	NA	NA	NA	0.811269	0.879032	NA	NA	NA	NA	NA	NA	NA	NA
Bifidobacterium kashiwanohense	0.529726	0.650657	0.748468	0.895086	0.756696	0.281846	0.238223	0.918193	0.851034	0.885125	0.948631	0.948356	0.891343	0.829007	0.862292	0.80353
Bifidobacterium longum subsp infantis	0.965713	0.94414	0.489024	0.3966	0.505338	0.543936	0.960143	0.726023	0.851034	0.885125	0.948631	0.00607179	0.0962145	0.827172	0.902058	0.80353
Bifidobacterium longum subsp longum	0.443218	0.701732	0.748468	0.597053	0.509058	0.533946	0.811269	0.726023	0.572878	0.465564	0.982759	0.948356	0.891343	1	0.862292	0.80353
Bifidobacterium longum subsp suis	0.536099	0.650657	0.319085	0.597053	0.822547	0.878798	0.811269	0.579084	0.851034	0.362194	0.948631	0.983879	0.891343	0.826551	0.862292	0.811331
Bifidobacterium longum subspp	NA	0.712434	0.390175	0.597053	0.505338	0.321543	0.492749	2.29562e-05	NA	NA	0.0178525	0.948356	0.891343	0.826551	1	0.80353
Bifidobacterium magnum	0.448234	0.712434	0.399483	0.56585	0.505338	0.932284	0.960143	0.879032	0.851034	0.885125	0.948631	0.948356	0.891343	0.826551	1	0.902242
Bifidobacterium margollesii	NA	NA	NA	NA	NA	NA	NA	NA	NA	NA	NA	NA	NA	NA	NA	NA
Bifidobacterium merycicum	NA	0.712434	NA	NA	NA	NA	NA	NA	NA	NA	NA	NA	NA	NA	NA	NA
Bifidobacterium mongoliense	0.448234	0.94414	0.390175	0.3966	0.459972	NA	0.811269	NA	0.851034	0.885125	NA	0.948356	0.891343	NA	0.862292	NA
Bifidobacterium parmae	0.448234	0.650657	0.390175	NA	NA	NA	NA	NA	0.851034	NA	NA	NA	NA	NA	NA	NA
Bifidobacterium pseudocatenulatum	0.443218	0.94414	0.487602	0.807251	0.949147	0.518435	0.960143	0.726023	0.572878	0.753812	0.948631	0.948356	0.936717	0.829007	0.878524	0.80353
Bifidobacterium pseudolongum subsp globosum	0.443218	0.94414	0.390175	0.3966	0.459972	0.165953	0.811269	0.726023	0.574761	0.753812	0.948631	0.948356	0.936717	0.826551	0.902058	0.80353
Bifidobacterium pseudolongum subsp pseudolongum	0.443218	0.94414	0.399483	0.3966	0.459972	0.166029	0.811269	0.726023	0.943649	0.885125	0.948631	0.948356	0.891343	0.829007	0.902058	0.80353
Bifidobacterium pseudolongum subspp	0.443218	0.94414	0.748468	0.597053	0.509058	0.543936	0.960143	0.879032	0.792341	0.531013	0.982759	0.948356	0.891343	0.829007	0.862292	0.80353
Bifidobacterium reuteri	0.908886	0.922312	0.220158	0.3966	0.949147	0.543936	NA	NA	0.851034	0.885125	NA	NA	0.891343	0.921198	NA	NA
Bifidobacterium saguini	0.529726	NA	0.487602	NA	NA	NA	NA	NA	0.851034	NA	NA	NA	NA	NA	NA	NA
Bifidobacterium scardovii	0.908886	0.94414	0.390175	0.5515	0.459972	0.274947	0.811269	0.78151	0.851034	0.885125	0.948631	0.948356	0.891343	0.826551	0.862292	0.80353
Bifidobacterium thermacidophilum subsp porcinum	0.908886	0.718443	NA	NA	NA	NA	NA	NA	0.851034	0.885125	NA	NA	NA	NA	NA	NA
Bifidobacterium thermacidophilum subsp thermacidophilum	0.365153	0.94414	NA	0.597053	0.498293	0.533946	0.811269	0.879032	NA	0.885125	NA	0.948356	0.891343	0.921198	0.862292	NA
Bifidobacterium thermophilum	0.144124	0.94414	0.829325	0.894192	0.505338	0.543936	0.811269	0.726023	0.572878	0.885125	0.948631	0.948356	0.891343	0.921198	NA	0.80353
Bifidobacterium tissieri	NA	0.718443	NA	NA	NA	NA	NA	NA	NA	0.885125	NA	NA	NA	NA	NA	NA
Bifidobacterium tsurumiense	NA	NA	0.489024	0.56585	NA	NA	NA	NA	NA	NA	0.948631	0.948356	NA	NA	NA	NA
Putative new bacterial species	0.24274	0.650657	0.487602	0.5515	0.505338	0.533946	0.11778	0.726023	0.851034	0.969506	0.948631	0.948356	0.891343	0.829007	0.862292	0.80353

## Sheet: Table S10
Table S10 Distance between clusters, as well as between cluster centers
	Distance between Cluster Centers
	C1	C2	C3	C4	C5	C6	C7	C8	C9	C10	C11	C12	C13	C14	C15	C16	C17
Cluster1	0	0.27088	0.85647	0.93237	0.87792	0.83624	0.97273	0.8904	0.91549	0.94185	0.58177	0.76889	0.88615	0.91344	1.00879	0.95135	0.99212
Cluster2	0.27088	0	0.62279	0.73996	0.32768	0.45612	0.80002	0.61569	0.74374	0.83144	0.15564	0.55341	0.75147	0.75496	0.96707	0.89545	0.96702
Cluster3	0.85647	0.62279	0	0.90894	0.79041	0.79998	0.88397	0.83944	0.81637	0.9282	0.55265	0.61647	0.87067	0.87238	0.97791	0.89307	1.00648
Cluster4	0.93237	0.73996	0.90894	0	0.87662	0.84492	0.95673	0.9028	0.94666	0.97759	0.73335	0.83597	0.95242	0.94736	1.01486	0.9948	0.98676
Cluster5	0.87792	0.32768	0.79041	0.87662	0	0.67286	0.9222	0.72331	0.87651	0.87833	0.34925	0.80182	0.88507	0.80528	0.95583	0.96863	0.98455
Cluster6	0.83624	0.45612	0.79998	0.84492	0.67286	0	0.44926	0.41261	0.53336	0.74875	0.42439	0.72077	0.71	0.65764	0.87725	0.92371	0.92709
Cluster7	0.97273	0.80002	0.88397	0.95673	0.9222	0.44926	0	0.71364	0.76853	0.82577	0.7563	0.86289	0.88118	0.85756	0.80685	1.00364	0.99523
Cluster8	0.8904	0.61569	0.83944	0.9028	0.72331	0.41261	0.71364	0	0.72954	0.85063	0.56575	0.75078	0.81737	0.79282	0.95181	0.96842	0.98637
Cluster9	0.91549	0.74374	0.81637	0.94666	0.87651	0.53336	0.76853	0.72954	0	0.86367	0.67324	0.75076	0.68556	0.75654	0.97177	0.99224	0.97166
Cluster10	0.94185	0.83144	0.9282	0.97759	0.87833	0.74875	0.82577	0.85063	0.86367	0	0.76987	0.80141	0.88392	0.91634	0.84072	0.92857	1.0052
Cluster11	0.58177	0.15564	0.55265	0.73335	0.34925	0.42439	0.7563	0.56575	0.67324	0.76987	0	0.19159	0.6504	0.66374	0.91944	0.85238	0.93461
Cluster12	0.76889	0.55341	0.61647	0.83597	0.80182	0.72077	0.86289	0.75078	0.75076	0.80141	0.19159	0	0.67698	0.73755	0.91795	0.8742	0.97277
Cluster13	0.88615	0.75147	0.87067	0.95242	0.88507	0.71	0.88118	0.81737	0.68556	0.88392	0.6504	0.67698	0	0.68393	0.98367	0.96979	0.99565
Cluster14	0.91344	0.75496	0.87238	0.94736	0.80528	0.65764	0.85756	0.79282	0.75654	0.91634	0.66374	0.73755	0.68393	0	0.90351	0.98632	1.00047
Cluster15	1.00879	0.96707	0.97791	1.01486	0.95583	0.87725	0.80685	0.95181	0.97177	0.84072	0.91944	0.91795	0.98367	0.90351	0	0.97145	1.02763
Cluster16	0.95135	0.89545	0.89307	0.9948	0.96863	0.92371	1.00364	0.96842	0.99224	0.92857	0.85238	0.8742	0.96979	0.98632	0.97145	0	0.96084
Cluster17	0.99212	0.96702	1.00648	0.98676	0.98455	0.92709	0.99523	0.98637	0.97166	1.0052	0.93461	0.97277	0.99565	1.00047	1.02763	0.96084	0
C：indicates cluster

[truncated: 1 more sheets: ESM]
